# Supplementary material for: Tough polyurethane elastomers with high strength and rapid healing ability
Source: Royal Society of Chemistry journal article supplement (doi:10.1039/d2ma01021f), 2023-01-01
Supplement: d2ma01021f1.pdf [file d2ma01021f1.pdf]

*Supporting Information for*

**Toughness polyurethane elastomers with high strength and rapid healing ability.**

**Chenghui Qiao<sup>a</sup>, Xiurui Jian<sup>a</sup>, Zhengguo Gao<sup>a</sup>, Qingfu Ban<sup>\*a</sup>, Xintao Zhang<sup>b</sup>, Huimin Wang<sup>a</sup> and Yaochen Zheng<sup>\*a</sup>**

<sup>a</sup> Department of Polymer Science and Engineering, College of Chemistry and Chemical Engineering, Yantai University, 30 Qingquan Road, Yantai 264005, P. R. China.

<sup>b</sup> School of environmental and material engineering, Yantai University, 30 Qingquan Road, Yantai, P. R. China.

**Figure S1.**  $^1\text{H}$  NMR spectra of  $\text{PU}_{3:7}$  -  $\text{PU}_{7:3}$ .

**Figure S2.** Peak fitting of FTIR spectra of  $\text{PU}_{3:7}$  -  $\text{PU}_{7:3}$  in the range of  $1600 - 1760 \text{ cm}^{-1}$

**Figure S3.** GPC curves of  $\text{PU}_{3:7}$  -  $\text{PU}_{7:3}$ .

**Figure S4.** UV-Vis spectra of the PU elastomers with a thickness of 0.3 mm.

**Figure S5.** Photograph of  $\text{PU}_{5:5}$  sample.

**Figure S6.** Results of the cyclic tensile testing of  $\text{PU}_{3:7}$  -  $\text{PU}_{7:3}$ .

**Figure S7.** Loss modulus of PU elastomers.

**Figure S8.** Storage modulus of PU elastomers.

**Figure S9.** Tensile strength and healing efficiency of  $\text{PU}_{3:7} - \text{PU}_{7:3}$  at  $70^\circ\text{C}$  for 12 h.

**Figure S10.** Tensile strength and healing efficiency of  $\text{PU}_{5:5}$  at  $30^\circ\text{C}$  for different healing time.

**Figure S11.** Possible mechanism for the healing efficiency less than 100%.

**Table S1.** Results of GPC curves of  $\text{PU}_{3:7}$  -  $\text{PU}_{7:3}$ .

**Table S2.** Summarized tensile strength, strain at break and toughness of PU elastomers.

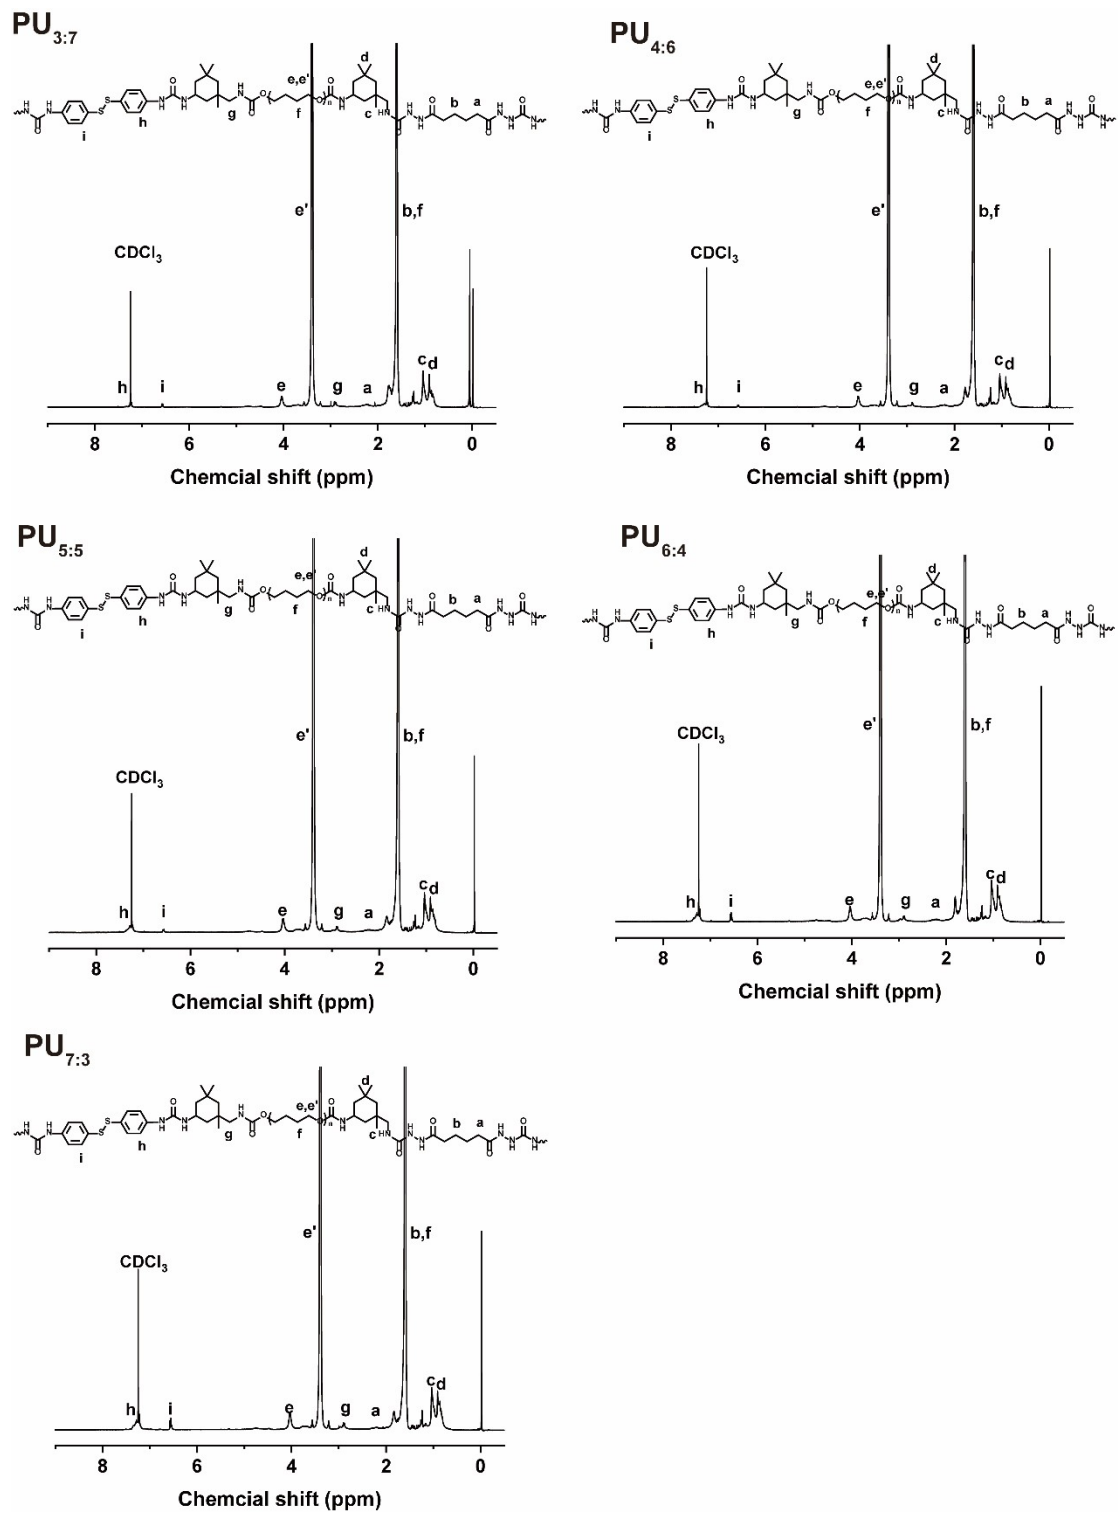

Figure S1.

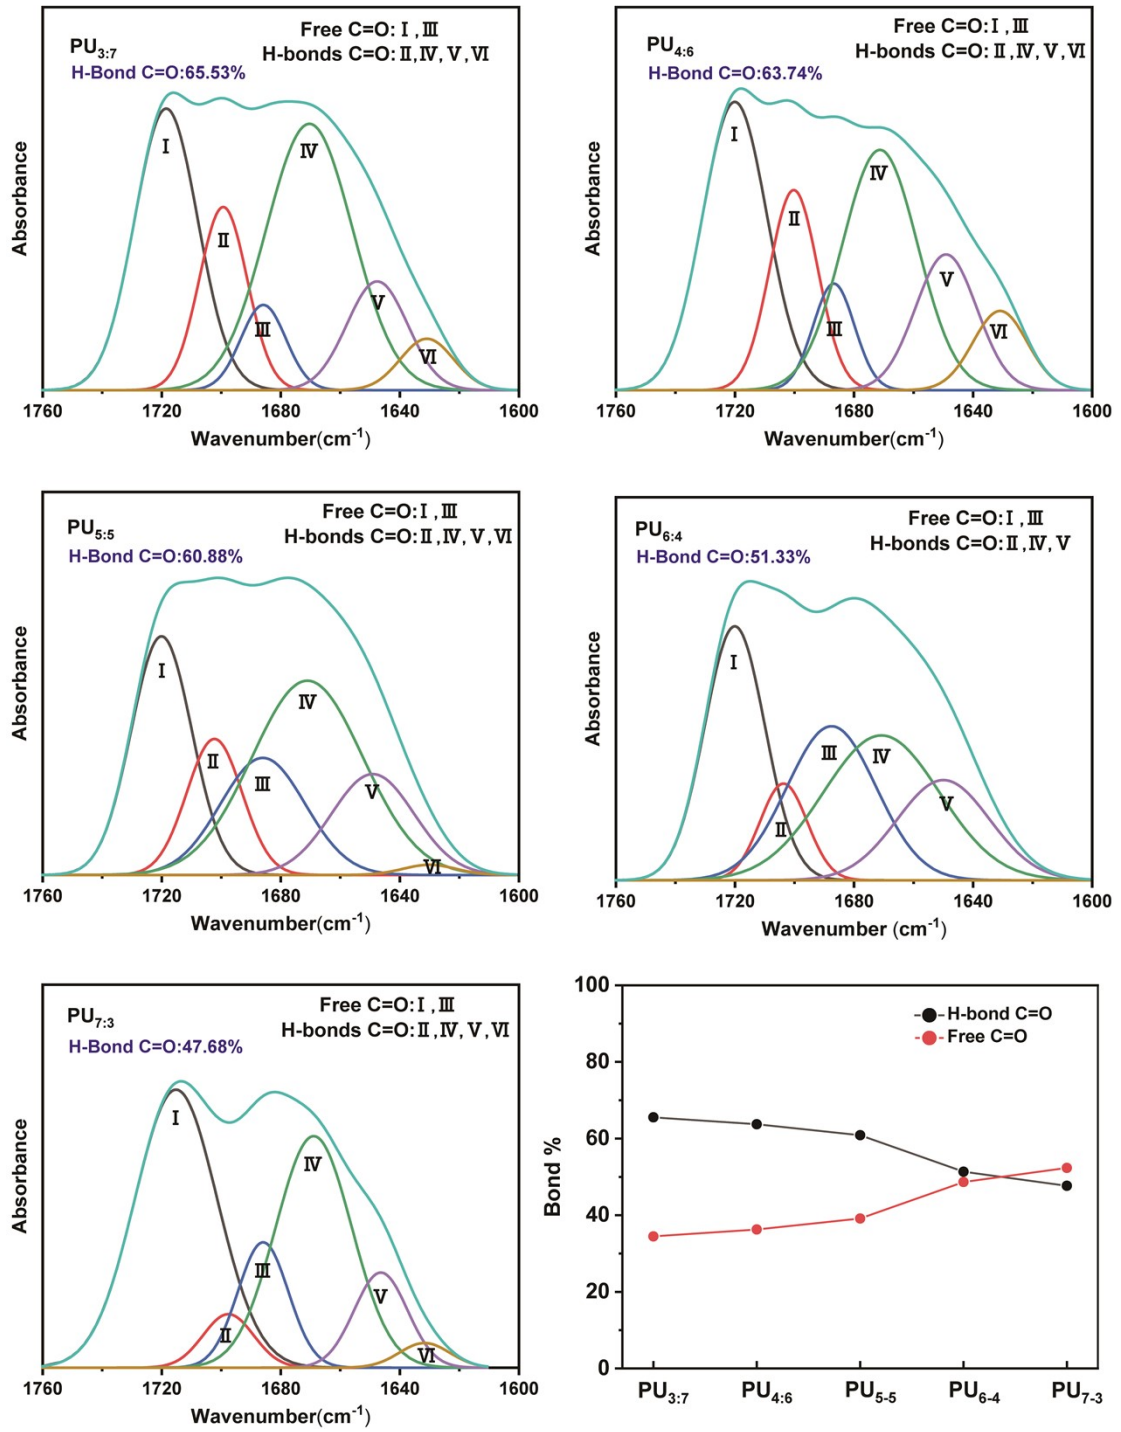

Figure S2

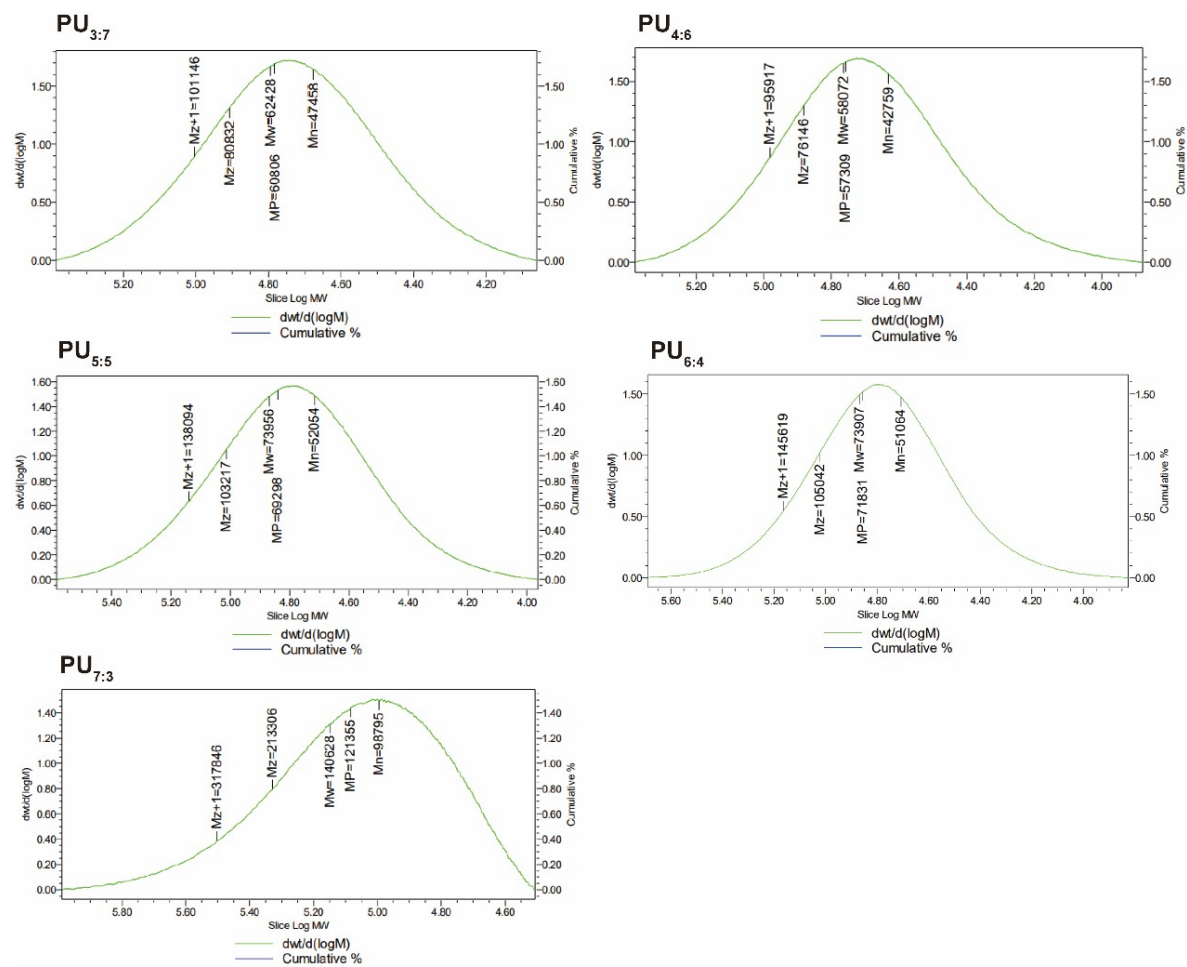

Figure S3

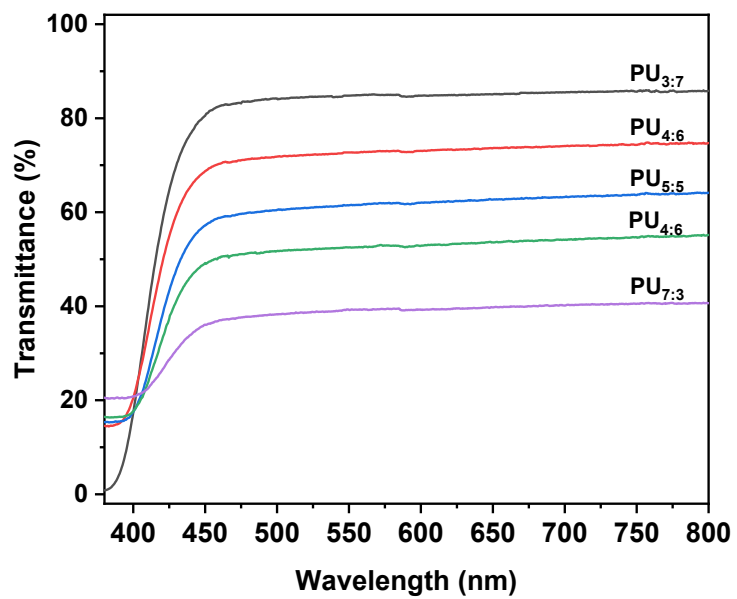

Figure S4

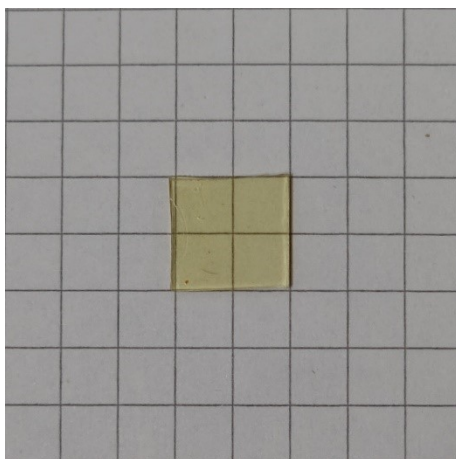

Figure S5

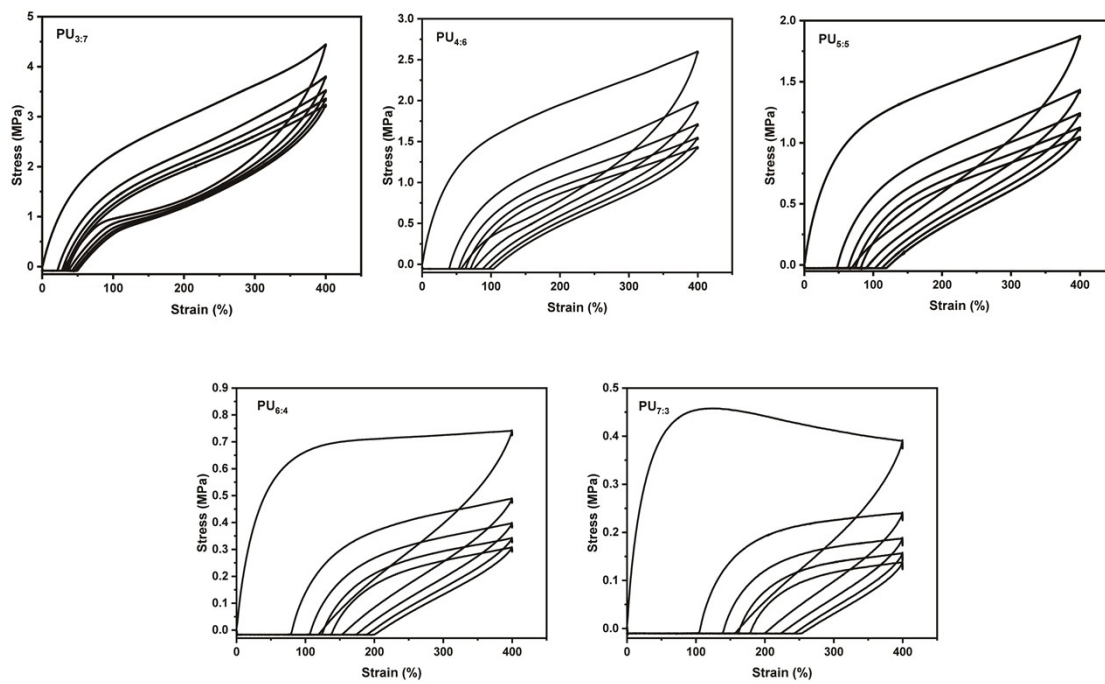

**Figure S6**

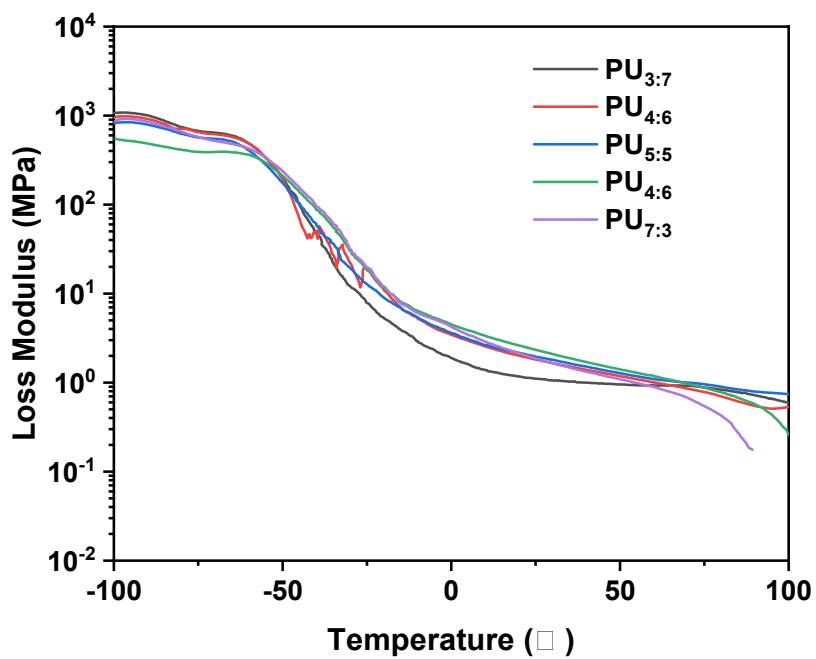

Figure S7

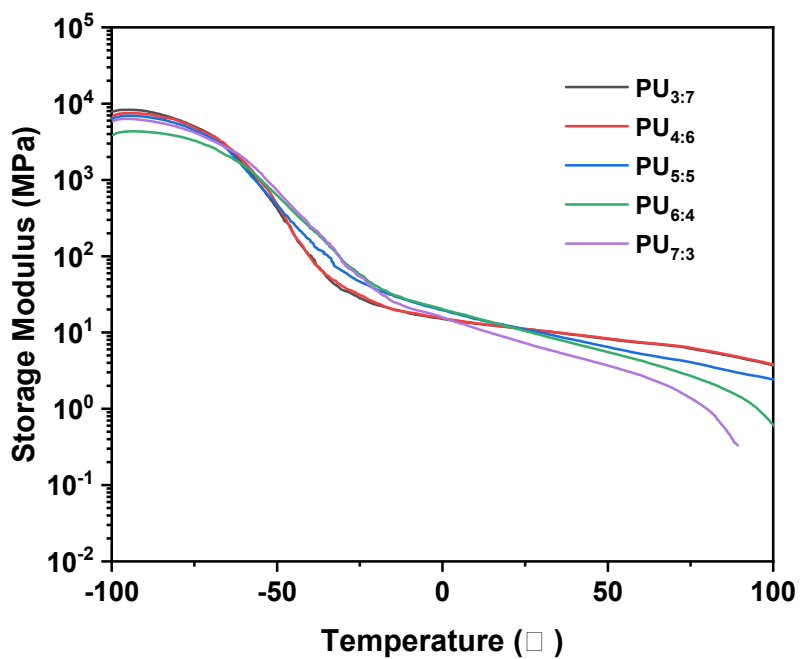

Figure S8



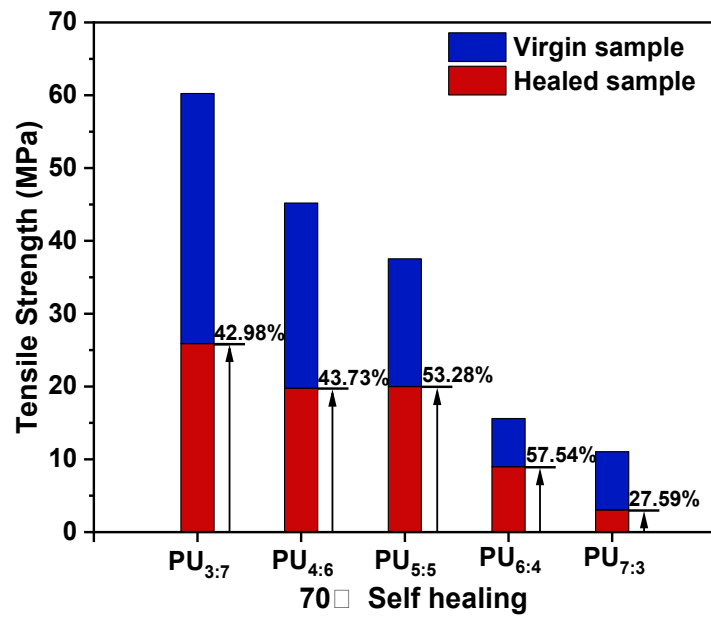

Figure S9

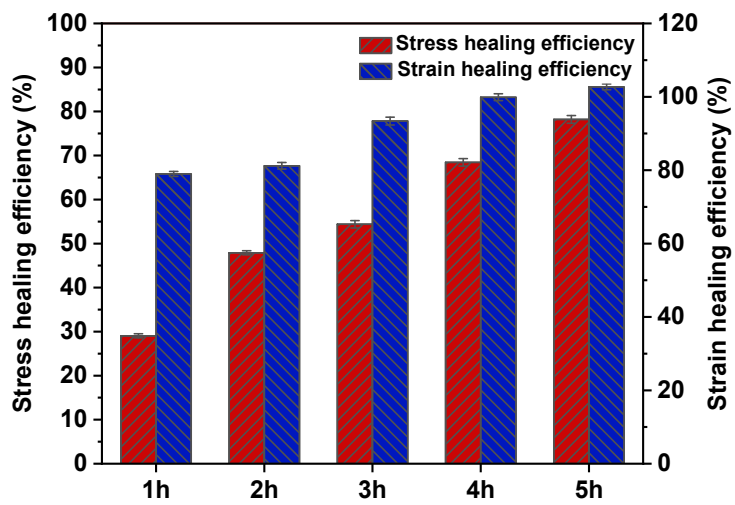

Figure S10

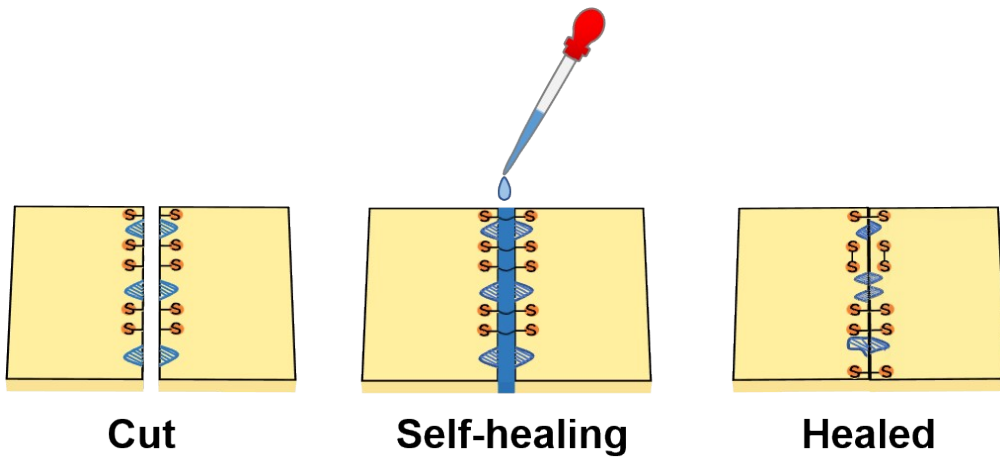

**Figure S11**

**Table S1**

| Samples           | $M_n$ ( $\times 10^3$ g/mol) | $M_w$ ( $\times 10^3$ g/mol) | PDI  |
|-------------------|------------------------------|------------------------------|------|
| PU <sub>3:7</sub> | 47.45                        | 62.40                        | 1.32 |
| PU <sub>4:6</sub> | 42.76                        | 58.00                        | 1.36 |
| PU <sub>5:5</sub> | 52.05                        | 73.95                        | 1.42 |
| PU <sub>6:4</sub> | 51.06                        | 73.90                        | 1.45 |
| PU <sub>7:3</sub> | 98.79                        | 140.62                       | 1.42 |

**Table S2**

| Samples           | Stress (MPa) | Strain at break (%) | Toughness (MJ m <sup>-3</sup> ) |
|-------------------|--------------|---------------------|---------------------------------|
| PU <sub>3:7</sub> | 60.23        | 1398.5              | 257.24                          |
| PU <sub>4:6</sub> | 45.19        | 1372.9              | 190.14                          |
| PU <sub>5:5</sub> | 37.53        | 1352.1              | 158.93                          |
| PU <sub>6:4</sub> | 15.61        | 2115.1              | 120.70                          |
| PU <sub>7:3</sub> | 11.05        | 2209.9              | 92.17                           |
